# Supplementary material for: Holocene hydroclimate reconstruction based on pollen, XRF, and grain-size analysis and its implications for past societies of the Korean Peninsula
Source: Copernicus journal article supplement (doi:10.5194/cp-2020-98), 2020-08-07
Supplement: Supplementary file [file cp-2020-98-AC2-supplement.pdf]

1 Response to Anonymous Referee #2

2

3 We highly appreciate your constructive and insightful comments. Please refer to our response  
4 written below each of your comment.

5

6 1. General comments: The authors present multiple geochemical proxies data from a  
7 floodplain sedimentary core in Miryang, Korea. High resolution pollen, gran size, and  
8 XRF-scanning data show clear oscillation during the past ~8 kyrs. Although authors would  
9 like to reconstruct the paleoclimate conditions in this region and to discuss the climatic  
10 controlling factors and how human societies response to climate changes, there are some  
11 questions need to be clarified.

12

13 2. Questions need to be clarified: Line 40, authors should clarify why the methodology of  
14 pollen studies could not increase temporal resolution and what kind of resolution they  
15 would like to achieve (1-yr? 10-yr?). Temporal resolution is a relative concept and there  
16 are other factors need to be considered. If there has strong mixing or bioturbation, then  
17 even we could use few micrometer resolution to scan sediment core with XRF-scanner, it  
18 is still meaningless to claim the data we get has higher temporal resolution.

19 Response: We modified Lines 41–43 as follows: “~ this methodology contains physical  
20 limitations in enhancing the temporal resolution between samples (here, we refer to a temporal  
21 resolution issue in a relative sense to other methodologies when assuming equal reliability in  
22 sedimentary conditions). This problem arises from the fact that a certain amount (usually ~1 g)  
23 of bulk sediment should be manually picked for pollen sample preparation, while some other  
24 methodologies are available by drilling a smaller amount of sample (Lachniet, 2009) or even  
25 mechanically scanning sediment surfaces (Croudace et al., 2006). On the other hand,  
26 speleothem-based Holocene EASM reconstructions in the Korean Peninsula, which usually  
27 permit finer resolution than pollen analysis, have been confined to the last few thousand years  
28 and have not ~”

29

30 Line 49, author mentioned the relationship between climate change and human societies,  
31 but to specific, which part of human societies? Do authors mean the resilience of human  
32 societies, the limitation factors from climate changes, the total population changes, the  
33 food availability?

34 Response: We elaborated the sentence as follows: “~~ between climate change and human  
35 societies, including issues of population/migration (D’Andrea et al., 2011; Tallavaara et al.,  
36 2015), rise and fall of civilizations (Weiss et al., 1993), and societal unrest (Manning et al.,  
37 2017)”.

38

39 Line 73, do authors suggest we could explain the whole Korean Peninsula climate change  
40 with a single site and the whole peninsula population changes as well?

41 Response: As a subregion of East Asia, the Korean Peninsula is a relatively small area in a  
42 regional sense. Validity of using the core STP18-03 was also supported by providing another  
43 pollen record (GY-1) reconstructed within the peninsula (Fig. 6d), which showed a close  
44 resemblance to Miryang in this study (Fig. 6c). For more details on the GY-1 core, please refer  
45 to Park et al. (2019). Although there is some discrepancy between the two records during ca.  
46 6.4–6.0 ka BP, this issue was discussed with regards to a problem of temporal resolution in  
47 Sect. 5.2 (Please refer to a revised paragraph provided at the end of this document).

48

49 Line 77, authors mentioned this sedimentary core is derived from a floodplain, but authors  
50 did not provide clear evidence how sediments had been transported to here (by occasional  
51 flood? Or the main path of river had changed many times through time? Or it is a terrace  
52 that had been uplifted?). This is very important especially when authors would like to  
53 explain the grain size change to reconstruct climate changes in the past. If we don’t know  
54 how sediment had been transported to here, then it is very dangerous to treat authors pollen  
55 and XRF-scanning as an in-situ signals.

56 Response: First, we should clarify that the site has now been reclaimed into a rice paddy.  
57 Accordingly, we modified sentences in Lines 77–78 as “~~ located in a former floodplain of  
58 the Miryang River in the southeastern part of the Korean Peninsula (Fig. 1a–c), which is now  
59 reclaimed as a rice paddy” and in Line 100 as follows: “~~ was collected in 1-m sections from

60 a former floodplain of the Miryang River”.

61 As the sedimentation process on the site cannot be deduced from modern observations,  
62 we dedicated the first half of Sect 5.1 to discussing potential sediment transport mechanism to  
63 the coring site during the Holocene. Considering the regional setting in which the coring site  
64 is backed by small mountains while facing a small tributary (Miryang River) in front (Fig. 1c),  
65 we interpreted the sediments to have been accumulated by relative amounts of soils eroded  
66 from the background mountains as well as those transported by river discharges. This  
67 interpretation was based on consistently opposing trends of the Ti and sand content in our  
68 analysis and further supported by general coherency with the tree pollen percentages (Fig. 4b–  
69 e). During wet conditions, sand contribution by river discharge would have increased, while  
70 soil erosion from the background mountains would have decreased owing to enhanced tree  
71 growth and anchoring effect of tree roots, and vice versa during dry periods (Please see Sect.  
72 5.1). If they were not effectively reflecting hydroclimate change, they would not have achieved  
73 such a close relationship with each other throughout such a long period.

74 As the coring location was formerly a floodplain, occasional floods would certainly  
75 have happened in the area. However, there is no trace of large debris throughout the core, while  
76 core chronology is stable (Fig. 2). Therefore, it seems likely that our coring location was far  
77 enough from the river to be free of direct disturbance and that hydroclimatic implications of  
78 our multi-proxy data are reliable. The sedimentary environment of the coring location would  
79 have been sustained stable while being only modestly sourced by river discharge reflected as  
80 the sand fraction.

81 Likewise, a possibility of direct disturbance effect by the river path is extremely low,  
82 considering the stability in the age-depth model, absence of large debris as well as persistence  
83 of dark brown sediment color throughout the core (only except the reddish-brown one on the  
84 core top, which we interpreted as disturbed by human activity) (Fig. 2). In this context, it is  
85 likely that the coring site persisted as a stable floodplain during the Holocene before eventually  
86 desiccating at ca. 3.1 ka BP, which is implied by a near absence of the sand content and  
87 intermittence of pollen deposition (Fig. 4b and c). A possibility of terrace/uplift can also be  
88 obviated, as the sediment pertains to the Holocene period only, not a glacial-interglacial  
89 transition. There is not any geological evidence to support the terrace/uplift hypothesis.

90

91 We elaborated the sentence in Lines 188–190 as follows: “~ in nearby mountains  
92 such as Jongnamsan and Palbongsan (Fig. 1c) hills would have suppressed soil erosion via the  
93 anchoring effect of roots, leading to lower Ti XRF values”.

94 For clarification of the meaning, we also modified Line 176 as follows: “Considering  
95 the near absence of sand content in this zone and coincident change in the sediment colour (Fig.  
96 2a and e), this disruption may have been caused by a cessation of water supply from the river  
97 to the floodplain, possibly due to climate drying, dwindling of the river, and subsequent  
98 exposure of the site to air”.

99

100 Line 91, authors described modern forest species, but is it possible that author authors  
101 could provide surface soil pollen as a modern control to confirm that the modern  
102 assemblage of vegetation is similar to the pollen composition as well?

103 Response: We appreciate your comment but unfortunately, it is not available. Since a retrieved  
104 rice paddy now lies on the location, it is unlikely that the surface pollen would reflect the nearby  
105 vegetation as it had done during the Holocene as a wetland state.

106

107 Line 100-103, why authors could identify the uppermost and the lowermost of sediment  
108 core are affected by human activities? Please provide clear evidence (pictures?) and explain  
109 why there is no human activities during their study period.

110 Response: In the text, we attributed the uppermost part only (not the lowermost one) to human  
111 disturbance (please see Lines 100–102). For the uppermost part (0–125 cm), such interpretation  
112 was made because the location is now used as a rice paddy. This information is now clarified  
113 in the text by modifying sentences in Lines 77–78 as “~ located in a former floodplain of the  
114 Miryang River in the southeastern part of the Korean Peninsula (Fig. 1a–c), which is now  
115 reclaimed as a rice paddy”. Also, we modified the sentence in Lines 101–102 as follows: “as  
116 the former were regarded to have been disturbed by agriculture and the latter consisted mainly  
117 of gravel”. Also, it should be noted that our study period is a result of an even more conservative  
118 approach regarding the issue of human activities. Referring to Yoon et al. (2005) which detected  
119 evidence of agriculture in the Miryang area from ca. 2.3 ka BP, we refrained from making any  
120 paleoenvironmental interpretation on our data above 365 cm (not just above 125 cm), which

121 corresponds to the time of ca. 2.3 ka BP.

122

123 Line 109-110, why these two 14C dates are omitted? Why these 2 dates have anomalous  
124 ages? Please explain.

125 Response: Except those two radiocarbon dates (795 and 1032 cm), dating results exhibited high  
126 coherency along the core despite two different methodologies used (OSL and radiocarbon).  
127 However, only these two radiocarbon dates among a total of 16 dates were anomalous and  
128 therefore excluded from the age-depth model. I hope for your understanding that in age-depth  
129 modelling of paleo-studies, it is not always possible to figure out exact reasons for every  
130 anomalous dating result. In this study, we might think of potential disturbance effect by plant  
131 roots, for example. One may argue a possibility that these two dates are actually correct and  
132 that the other (generally older) six radiocarbon dates are artefacts of reservoir effect, which is  
133 a common source of error when dealing with radiocarbon dating results. However, at least in  
134 our model this hypothesis can be obviated, as these six dates are highly coherent with the  
135 nearby OSL dates which are free of reservoir effect.

136

137 Line 160, similar to line 77, where does the Ti come from?

138 Response: We interpreted Ti as soil eroded from mountains in the background such as  
139 Jongnamsan and Palbongsan (Fig. 1c). For details, please refer to our response above.

140

141 In Lines 185-188, authors claim they interpret Ti signal as a reflection change in the  
142 “Korean Peninsula”. But there are no references to support their interpretations.

143 Response: We modified the expression as follows: “~ as reflecting hydroclimate change in  
144 the study area”.

145

146 Furthermore, Ti does not “follow” the insolation changes, at least by my naked eyes.  
147 Authors could argue there is a clear increasing ~4.8 to 3.8-kyr, but the variabilities during  
148 8-5 kyr show rather centennial oscillation than gradual shifting.

149 Response: We modified Line 179 as follows: “~ data are broadly consistent with ~”. We also  
150 modified Lines 184–185 as follows: “While centennial oscillations are relatively pronounced  
151 during the early–mid Holocene, Ti XRF values also change in tandem with these two proxies  
152 such that the signal generally increases towards the late Holocene (Fig. 4b)”.

153

154 Finally, in lines 229-237, authors would like to connect their records to broad regional  
155 forcings, such as ITCZ, ENSO, and Kuroshio strength, however, they could not provide  
156 good interpretation to explain the differences between their records to other records with  
157 in the peninsula.

158 Response: To clarify the discussion, we revised the paragraph (Lines 229–249) as follows:  
159 “Among these periods, a sign of drying and/or cooling around 6.4–6.0 ka BP (Fig. 4b–e) at  
160 Miryang is consistent with our previous finding at Lake Pomaeho in the central Korean  
161 Peninsula (Constantine et al., 2019) (Fig. 1b). Outside of the peninsula, Daihai Lake (Xiao et  
162 al., 2004) and Gonghai Lake (Chen et al., 2015a) in North China and Dongge Cave in South  
163 China (Wang et al., 2005) (Fig. 1a) also record abrupt shifts toward less precipitation at ca.  
164 6.4–6.0 and 7.5–7.1 ka BP. These findings altogether suggest a possibility that the climate  
165 events were widespread phenomena in the East Asian region. Nevertheless, this possibility  
166 should be carefully addressed, as some study sites such as Lake Xiaolongwan (Chu et al., 2014;  
167 Xu et al., 2019) and Lake Sihailongwan (Stebich et al., 2015) (Fig. 1a) do not clearly exhibit a  
168 drying/cooling signal. Regarding this inconsistency, a couple of possibilities can be considered.  
169 One possible factor is an issue of temporal resolution. In the case of Dongge Cave, the high-  
170 resolution DA stalagmite (Wang et al., 2005) detects a drying signal while the D4 stalagmite  
171 (Dykoski et al., 2005), with a lower resolution, does not. It is not reasonable to assume  
172 difference in actual climate conditions because they were collected from the same cave.  
173 Similarly, in the Korean Peninsula, our previous study at Gwangyang (Fig. 1b, GY-1) does not  
174 exhibit a climate shift at ca. 6.4–6.0 ka BP (Park et al., 2019) in contrast to Miryang (this study).  
175 As Gwangyang is located only ~100 km west to Miryang, it is unlikely that climate conditions  
176 were considerably different between those two study sites. Rather, temporal resolution is a  
177 more convincing explanation as the sample intervals covering the period are large in GY-1 (~80  
178 years) relative to our present study (~20–30 years).

179 Besides the resolution issue, potential bias inherent in proxy-based climate

180 reconstructions should be also noted. In pollen records, source area and/or overestimation  
181 effects inherent in palynological methodology (Seppä and Bennett, 2003) might affect pure  
182 climate signals. For example, in this study, we suspect that thermal optimum during the early  
183 to mid-Holocene (Wanner et al., 2008) might have rendered the smaller amplitude of the  
184 vegetation response during ca. 7.5–7.1 ka BP, whereas the other sedimentary proxies, XRF and  
185 sand percentage data exhibit clearer phase shifts with the Pacific Ocean (Fig. 4b–g). Similarly,  
186 in pollen records from Daihai Lake (Xiao et al., 2004) and Gonghai Lake (Chen et al., 2015a),  
187 drying signals during ca. 7.5–7.1 ka BP are less evident than ca. 6.4–6.0 ka BP. In this context,  
188 it cannot be ruled out that such climate shifts are not manifest in some records simply due to  
189 methodological problems. Furthermore, limiting to the cases of Lake Xiaolongwan (Chu et al.,  
190 2014; Xu et al., 2019) and Lake Sihailongwan (Stebich et al., 2015) in Northeast China (Fig.  
191 1a), regionally varying climate imprints caused by high-latitude forcing such as sea ice in the  
192 Sea of Okhotsk (Stebich et al., 2015) should also be considered although this is beyond our  
193 research scope. Overall, in order to elaborate understanding on potential climate deterioration  
194 events at ca. 6.4–6.0 and 7.5–7.1 ka BP, further high-resolution data are required from multiple  
195 locations in East Asia. At least in this study, our finding at Miryang adds to evidence that such  
196 climate shifts were likely present in the Korean Peninsula during these two periods”.

197

198

## 199 References

200

201 Park, J., Park, J., Yi, S., Kim, J. C., Lee, E. & Choi, J. 2019. Abrupt Holocene climate shifts in  
202 coastal East Asia, including the 8.2 ka, 4.2 ka, and 2.8 ka BP events, and societal  
203 responses on the Korean peninsula. *Scientific reports*, 9, 1-16.

204

205

206

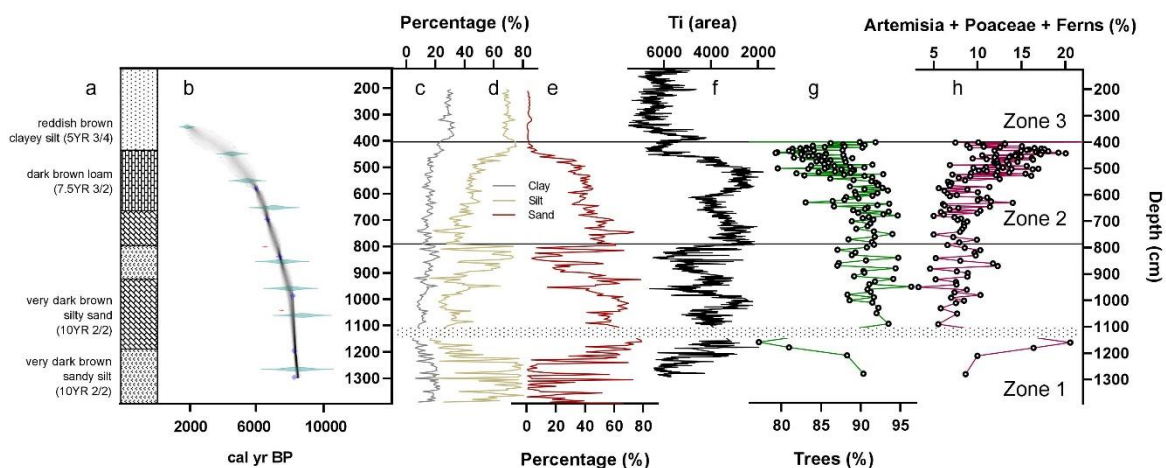

207 **Figure 2:** (a) Lithology of the STP18-03 core and (b) age–depth model constructed using the R *bacon* package  
208 ver. 2.3 (Blaauw and Christen, 2011) with the IntCal13 calibration dataset (Reimer et al., 2013). Samples omitted  
209 ed from the chronology model are indicated in red. (c–h) results of multi-proxy analyses of (c) clay fraction, gr  
210 ay; (d) silt fraction, light brown; (e) sand fraction, dark brown; (f) titanium (Ti) content, black; (g) tree pollen  
211 percentage, green; and (h) sum of *Artemisia* (mugwort) and *Poaceae* (wild grass) pollen and fern spores, magen  
212 ta. Zones are separated by black horizontal lines.
